# Supplementary material
Source: MDPI journal article supplement (https://www.mdpi.com/2073-4468/10/4/45)
Supplement: s1 [file s1]

**Supplementary Data**

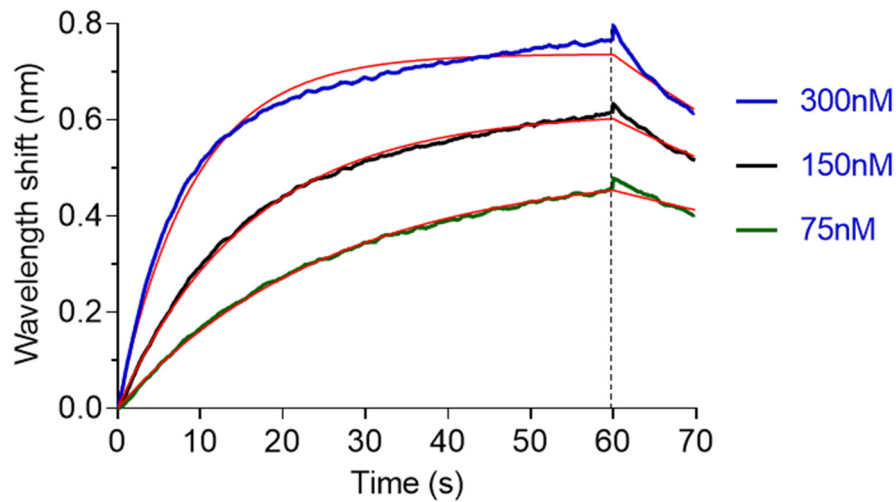

**Supplementary Figure S1. Binding of MD65-AG to hFcRn.** Anti-Fab coated sensors were loaded with MD65-AG (30  $\mu\text{g/ml}$ ) to reach 2.5 nm wavelength shift, and then washed. Sensors were then incubated with the indicated concentrations of hFcRn in pH 6.0, for 60 sec (association phase) and transferred to buffer-containing wells for additional 10 sec (dissociation phase). Binding and dissociation were measured as changes over time in light interference after subtraction of parallel measurements from unloaded biosensors. Sensorgrams were fitted (Red lines) with a 1:1 binding model.
